# Supplementary material for: High-throughput Detection of T-DNA Insertion Sites for Multiple Transgenes in Complex Genomes
Source: Research Square preprint supplement (doi:10.21203/rs.3.rs-1325310/v1), 2022-02-11
Supplement: Supplementary file 5 [file 6c320616d93d1b53c3c32b0d.xlsx]

## Sheet: S2 Genome-specific primers
Table S2: List of all plant genomic primer sequences used for T-DNA flanking PCRs
			Non-specific primers		Site-specific primers
Line	Site	Putative insertion sites	Forward	Reverse	Forward	Reverse	Confirmed insertion site
Line #1415	Site #1	Chr7:4217182-4218794	n/a	n/a	CCCAGCGAACCTATGTCAGA	CCTCATGACCTTGTGGGATGA	Chr7:4217182-4218794
	Site #2	Chr5:9760563-9761659	GAGTAGTCTCGTGAGTTTGAG	CAAATACATACGCCATCCACC	GAGTAGTCTCGTGAGTTTGAG	CAAATACATACGCCATCCACC	Chr5:9760563-9761659
		Chr16:3808923-3809975
Line #1416	Site #1	Chr1:981152-982466	GTCGTCGGTTATGATTGTCTCT	TGAGTATGTGTAACTCTACGCTC	CCCAAAAGACGATCCAAACCG	ATACGCATTCACTTGACTAGAGAC	Chr15:982556-983127
		Chr15:981979-983192
		Chr19:1213802-1215110
	Site #2	Chr18:7461224-7461810	CGGTCCGTACCTATGTCGTG	TCACGGAGAACAGGGGAGAT	CATCCCACATAGATTTCTCATGCTC	TCACGGAGAACAGGGGAGAT	Chr18:7460899-7461810
		Chr18:7461829-7458620
		Chr7:13304219-13304809
		Chr10:15016531-15017729
		Chr10:15016531-15017099
	Site #3	Chr8:24442009-24442537	n/a	n/a	TGGTTCACAGGATACACACACTA	GCAGATCGAGATGAATGTGAATA	Chr8:24442009-24442537

## Sheet: S3 Transgene-specific primers
Table S3: Transgene-specific primer sequences used for T-DNA anchored PCRs
Border	T-DNA target(s)	Primer sequence	T-DNA feature	Insertion(s) confirmed
LB	OGC	TCTACAAATCTATCTCTCTCGAGG	35S promoter	Line #1415 Chr5:9760996
LB	OGC/OCP1	TCTGATCGAAAAGTTCGACAG	HPTII CDS	Line #1416 Chr15:982591
LB	OGC/OCP1	CGCAAGACCTTCCTCTATATAAG	35S promoter	Line #1415 Chr5:9760996
LB	OCP1	GCCCATCCTGGTCGAGC	HPTII CDS	Line #1416 Chr18:7461224
LB	OCP1	CAAGTTCAGCGTGTCCGG	HPTII CDS	Line #1415 Chr7:4217439; Line #1416 Chr8:24442089
LB	OGC/OCP1	CATTTCATTTGGAGAGGACACGC	PC-GW backbone	Line #1415 Chr7:4217439
RB	OGC	CCAGATGAATGCCTTATGC	OGC CDS	Line #1415 Chr5:9760996
RB	OCP1	AAAGTGGTACGAGGAAAACG	OCP1 CDS	Line #1416 Chr15:982591
