# Supplementary material for: High-throughput Detection of T-DNA Insertion Sites for Multiple Transgenes in Complex Genomes
Source: Research Square preprint supplement (doi:10.21203/rs.3.rs-1325310/v1), 2022-02-11
Supplement: Supplementary file 6 [file b468df3f46201503121d5270.docx]

**Additional file 3: Primers for indexing and sequencing adapter attachment.**

**Table S4. List of primer sequences used for multiplexing in PCR step 3.** List of primers sequences used in PCR step 3 to add unique barcodes to individual PCR reactions for multiplex sequencing. Nucleotides highlighted in blue correspond to 8-bp indices and bold nucleotides mark the primer regions complementary to the 5’ overhang sequences in genome-walking and transgene-specific primers. Primers with i5 prefix associate with genome-walking primers and P5 sequencing adapter and correspond to read 1 in a 2x150bp sequencing run whereas primers with an i7 prefix associate with the transgene-specific end of the amplicon, the P7 sequencing adapter, and read 2.

| i5-D501 | AATGATACGGCGACCACCGAGATCTACACAGGCTATAACACTCTTTC**CCTACACGACGCTCTTCCGATCT** |
| --- | --- |
| i5-D502 | AATGATACGGCGACCACCGAGATCTACACGCCTCTATACACTCTTTC**CCTACACGACGCTCTTCCGATCT** |
| i5-D503 | AATGATACGGCGACCACCGAGATCTACACAGGATAGGACACTCTTTC**CCTACACGACGCTCTTCCGATCT** |
| i5-D504 | AATGATACGGCGACCACCGAGATCTACACTCAGAGCCACACTCTTTC**CCTACACGACGCTCTTCCGATCT** |
| i5-D505 | AATGATACGGCGACCACCGAGATCTACACCTTCGCCTACACTCTTTC**CCTACACGACGCTCTTCCGATCT** |
| i5-D506 | AATGATACGGCGACCACCGAGATCTACACTAAGATTAACACTCTTTC**CCTACACGACGCTCTTCCGATCT** |
| i5-D507 | AATGATACGGCGACCACCGAGATCTACACACGTCCTGACACTCTTTC**CCTACACGACGCTCTTCCGATCT** |
| i5-D508 | AATGATACGGCGACCACCGAGATCTACACGTCAGTACACACTCTTTC**CCTACACGACGCTCTTCCGATCT** |
| i7-D701 | CAAGCAGAAGACGGCATACGAGATCGAGTAATGTGACTGGAGTTC**AGACGTGTGCTCTTCCGATCT** |
| i7-D702 | CAAGCAGAAGACGGCATACGAGATTCTCCGGAGTGACTGGAGTTC**AGACGTGTGCTCTTCCGATCT** |
| i7-D703 | CAAGCAGAAGACGGCATACGAGATAATGAGCGGTGACTGGAGTTC**AGACGTGTGCTCTTCCGATCT** |
| i7-D704 | CAAGCAGAAGACGGCATACGAGATGGAATCTCGTGACTGGAGTTC**AGACGTGTGCTCTTCCGATCT** |
| i7-D705 | CAAGCAGAAGACGGCATACGAGATTTCTGAATGTGACTGGAGTTC**AGACGTGTGCTCTTCCGATCT** |
| i7-D706 | CAAGCAGAAGACGGCATACGAGATACGAATTCGTGACTGGAGTTC**AGACGTGTGCTCTTCCGATCT** |
| i7-D707 | CAAGCAGAAGACGGCATACGAGATAGCTTCAGGTGACTGGAGTTC**AGACGTGTGCTCTTCCGATCT** |
| i7-D708 | CAAGCAGAAGACGGCATACGAGATGCGCATTAGTGACTGGAGTTC**AGACGTGTGCTCTTCCGATCT** |
| i7-D709 | CAAGCAGAAGACGGCATACGAGATCATAGCCGGTGACTGGAGTTC**AGACGTGTGCTCTTCCGATCT** |
| i7-D710 | CAAGCAGAAGACGGCATACGAGATTTCGCGGAGTGACTGGAGTTC**AGACGTGTGCTCTTCCGATCT** |
| i7-D711 | CAAGCAGAAGACGGCATACGAGATGCGCGAGAGTGACTGGAGTTC**AGACGTGTGCTCTTCCGATCT** |
| i7-D712 | CAAGCAGAAGACGGCATACGAGATCTATCGCTGTGACTGGAGTTC**AGACGTGTGCTCTTCCGATCT** |

Oligonucleotide sequences © 2021 Illumina, Inc. All rights reserved.
